# Supplementary material for: Presence of anthraquinone in coffee and tea samples. An improved methodology based on mass spectrometry and a pilot monitoring programme
Source: Royal Society of Chemistry journal article supplement (doi:10.1039/d0ay01962c), 2020-11-26
Supplement: d0ay01962c1.pdf [file d0ay01962c1.pdf]

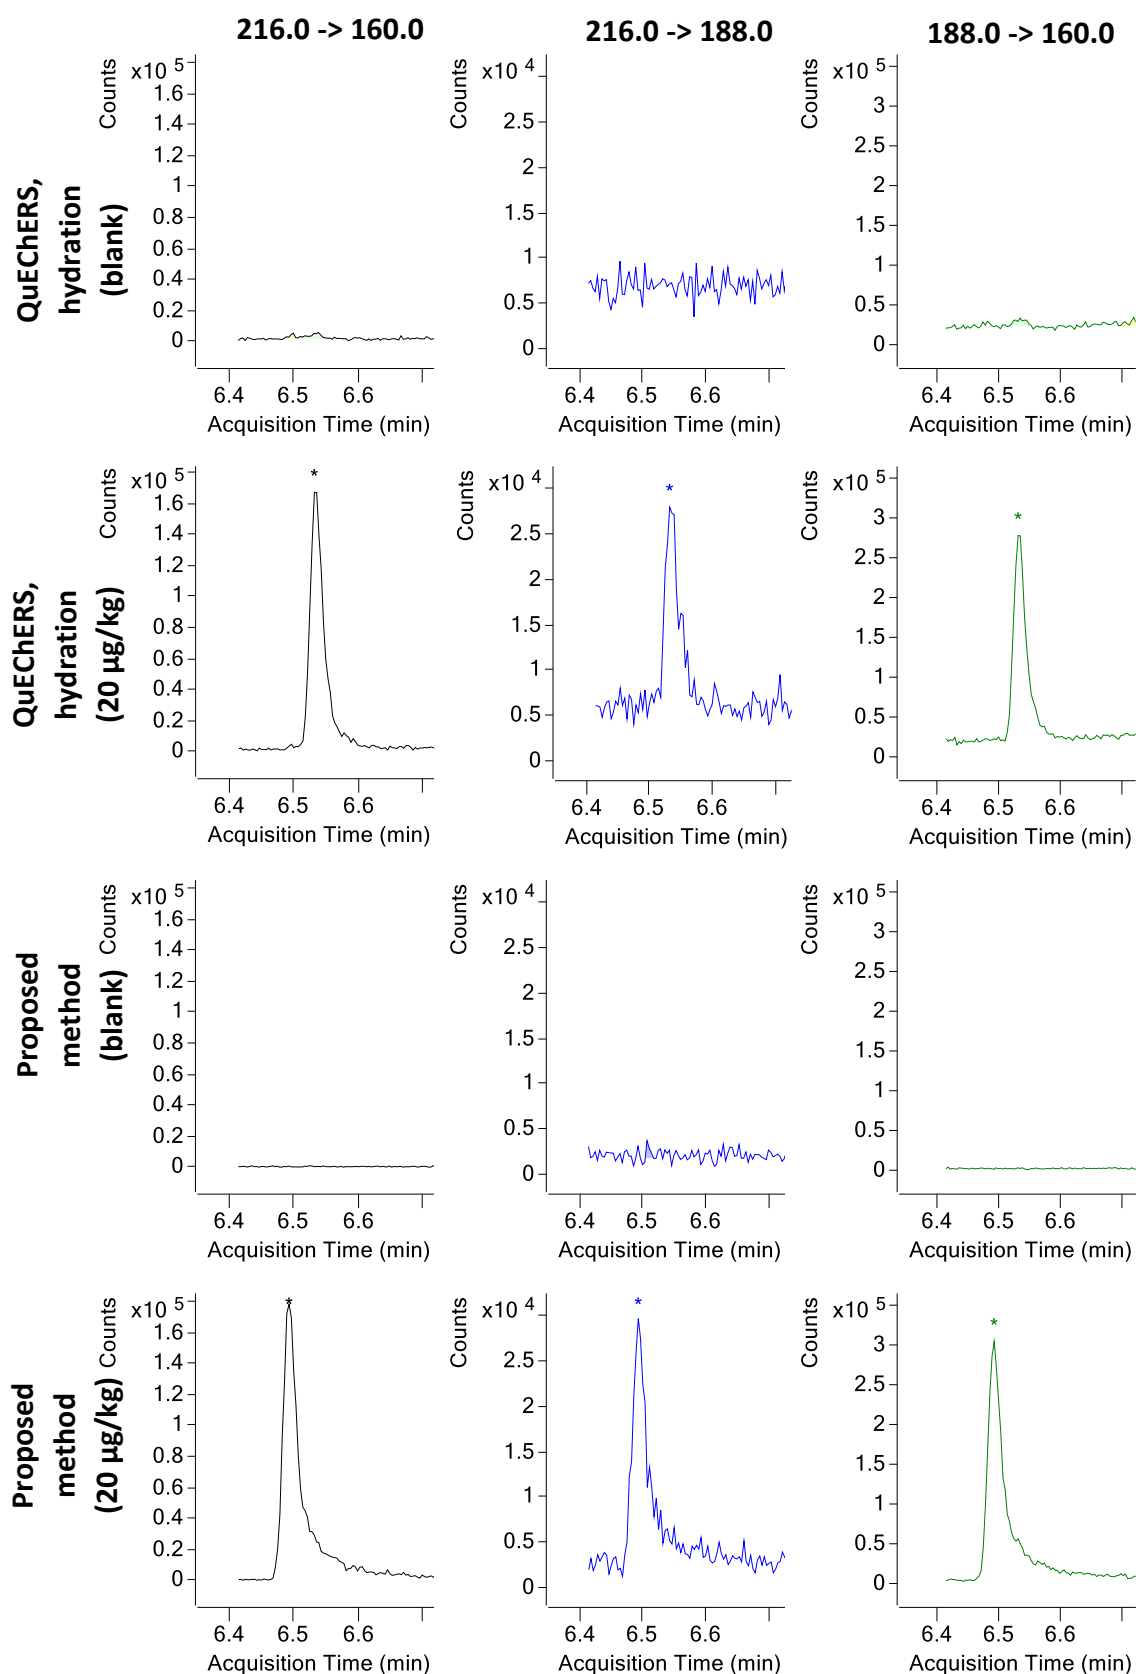

**Figure S1.** Chromatograms of the MRM transitions of AQ-D<sub>8</sub> in a QuEChERS Earl Grey tea extract with a hydration step (*first row, blank sample; second row, sample spiked with 20 µg/kg of AQ-D<sub>8</sub>*) and the same sample extracted with the proposed manual method (*third row, blank sample; fourth row, sample spiked with 20 µg/kg of AQ-D<sub>8</sub>*).

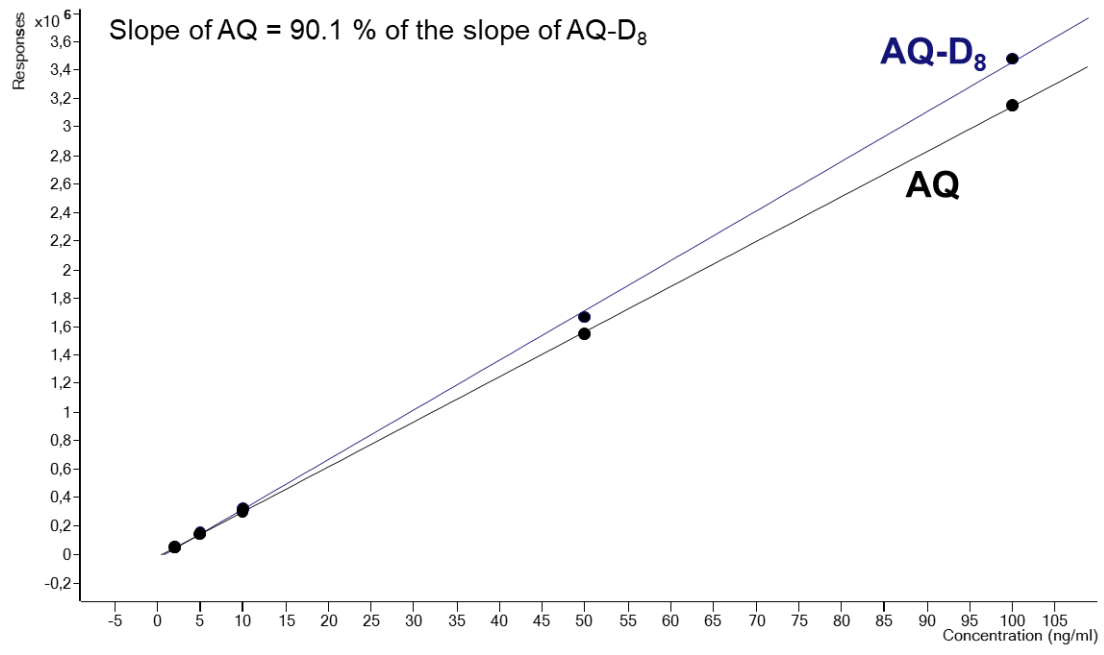

**Figure S2.** Comparison of AQ and AQ-D<sub>8</sub> calibration curves in tea M24 extract.
