# Supplementary material for: Presence of anthraquinone in coffee and tea samples. An improved methodology based on mass spectrometry and a pilot monitoring programme
Source: Royal Society of Chemistry journal article supplement (doi:10.1039/d0ay01962c), 2020-11-26
Supplement: d0ay01962c2.pdf [file d0ay01962c2.pdf]

**Table S1.** Monitoring of AQ in dry matrixes samples.

| Sample code | Matrix                        | Purchase country | AQ (M24)<br>(µg/kg) | AQ (AM12)<br>(µg/kg) |
|-------------|-------------------------------|------------------|---------------------|----------------------|
| S01         | Coffee                        | S                |                     |                      |
| S02         | Tea (black)                   | S                |                     |                      |
| S03         | Oregano                       | S                |                     |                      |
| S04         | Parsley                       | S                |                     |                      |
| S05         | Thymus                        | S                |                     |                      |
| S06         | Rosemary                      | S                |                     |                      |
| S07         | Tea (green)                   | S                |                     |                      |
| S08         | Tea (rooibos)                 | S                |                     |                      |
| S09         | Tea (camomile)                | S                |                     |                      |
| S10         | Tea (red)                     | S                |                     |                      |
| S11         | Tea (green)                   | S                | 5.8                 | < LOQ                |
| S12         | Tea (white)                   | S                |                     |                      |
| S13         | Tea (Oolong)                  | S                | 7.7                 | 7.7                  |
| S14         | Tea (Bancha)                  | S                |                     |                      |
| S15         | Tea (green)                   | S                |                     |                      |
| S16         | Coffee                        | S                |                     |                      |
| S17         | Coffee                        | S                |                     |                      |
| S18         | Coffee                        | S                |                     |                      |
| S19         | Coffee                        | S                |                     |                      |
| S20         | Coffee                        | S                |                     |                      |
| S21         | Coffee (Powdered milk)        | S                |                     |                      |
| S22         | Coffee                        | S                |                     |                      |
| S23         | Coffee (freeze-dried)         | S                |                     |                      |
| S24         | Tea (camomile & rooibos)      | S                |                     |                      |
| S25         | Tea (Earl Gray)               | S                | 18.0                | 17.2                 |
| S26         | Tea (red)                     | S                | 9.8                 | 8.6                  |
| S27         | Tea (green)                   | S                | 7.6                 | 7.7                  |
| S28         | Tea (black)                   | S                | 18.8                | 18.3                 |
| S29         | Tea (lime flower, linden)     | P                |                     |                      |
| S30         | Tea (green)                   | P                | 12.0                | 11.3                 |
| S31         | Tea (lemon balm)              | P                |                     |                      |
| S32         | Tea (common vervain)          | P                |                     |                      |
| S33         | Tea (black)                   | P                |                     |                      |
| S34         | Tea (peppermint)              | P                | 7.3                 | 7.6                  |
| S35         | Tea                           | P                | 9.2                 | 9.4                  |
| S36         | Tea (red)                     | S                | 10.2                | 9.5                  |
| S37         | Tea (mint)                    | S                |                     |                      |
| S38         | Tea (Ceylon)                  | S                | 7.9                 | 8.3                  |
| S39         | Tea (camomile)                | S                |                     |                      |
| S40         | Tea (camomile)                | P                | 7.8                 | 7.5                  |
| S41         | Tea (black)                   | P                |                     |                      |
| S42         | Tea (lime flower, linden)     | P                | 8.5                 | 8.0                  |
| S43         | Coffee (freeze-dried, decaf.) | P                |                     |                      |
| S44         | Coffee (freeze-dried)         | S                |                     |                      |
| S45         | Coffee (freeze-dried)         | S                |                     |                      |
| S46         | Coffee (freeze-dried)         | S                |                     |                      |
| S47         | Coffee                        | S                |                     |                      |
| S48         | Tea (camomile)                | S                |                     |                      |
| S49         | Tea (camomile)                | S                |                     |                      |
| S50         | Tea (camomile)                | S                |                     |                      |
| S51         | Tea (pennyroyal)              | S                |                     |                      |
| S52         | Coffee                        | S                |                     |                      |
| S53         | Coffee                        | S                |                     |                      |
| S54         | Coffee                        | S                |                     |                      |
| S55         | Tea (black, English blend)    | DK               |                     |                      |
| S56         | Tea (Moroccan mint)           | DK               | 7.8                 | 7.6                  |
| S57         | Tea (Green, lemmon)           | DK               | 11.9                | 12.4                 |
| S58         | Tea (Camomile)                | DK               | 8.4                 | 8.7                  |
| S59         | Tea (Forest fruit tea)        | DK               |                     |                      |

|     |                                        |    |      |       |
|-----|----------------------------------------|----|------|-------|
| S60 | Tea (Earl Grey)                        | DK |      |       |
| S61 | Tea (black, English breakfast)         | DK | 10.4 | 9.7   |
| S62 | Tea (green, fennel)                    | DK | 17.1 | 17.6  |
| S63 | Tea (camomile, fennel)                 | DK | 17.0 | 16.8  |
| S64 | Tea (organic rose, camomile, lavender) | DK | 10.5 | 10.9  |
| S65 | Tea (Green, lemmon)                    | DK | 15.0 | 15.8  |
| S66 | Tea (English)                          | DK | 8.0  | 8.5   |
| S67 | Tea (Red)                              | S  | 14.5 | 13.6  |
| S68 | Tea (rooibos)                          | S  |      |       |
| S69 | Tea                                    | S  | 5.7  | < LOQ |
| S70 | Tea (Red)                              | S  | 5.1  | < LOQ |
| S71 | Tea (camomile)                         | S  |      |       |
| S72 | Tea (Earl Grey)                        | DK | 11.8 | 11.5  |
| S73 | Tea (green)                            | DK | 5.1  | < LOQ |
| S74 | Tea (camomile)                         | DK | 8.9  | 9.4   |
| S75 | Tea (camomile)                         | DK | 7.2  | 7.5   |
| S76 | Tea (menta douce)                      | DK |      |       |
| S77 | Tea (ceylon)                           | DK |      |       |
| S78 | Tea (green & white tea)                | DK |      |       |
| S79 | Tea (black)                            | DK |      |       |
| S80 | Tea (Earl Gray)                        | DK |      |       |
| S81 | Tea (black)                            | DK |      |       |
| S82 | Tea (Earl Grey)                        | S  |      |       |
| S83 | Cocoa                                  | S  |      |       |
| S84 | Cocoa                                  | S  |      |       |
| S85 | Cocoa                                  | P  |      |       |
| S86 | Cocoa                                  | P  |      |       |
| S87 | Cocoa                                  | DK |      |       |
| S88 | Cocoa                                  | DK |      |       |
| S89 | Cocoa (deffated, powder)               | S  |      |       |
| S90 | Cocoa (deffated, powder)               | S  |      |       |

**DK:** Denmark; **P:** Portugal; **S:** Spain.
